# Supplementary material for: A structure-sensitive descriptor for the design of active sites on MoS2catalysts
Source: Royal Society of Chemistry journal article supplement (doi:10.1039/d3cy00575e), 2023-01-01
Supplement: d3cy00575e1.pdf [file d3cy00575e1.pdf]

## Electronic Supplementary Information

# A structure-sensitive descriptor for the design of active sites on MoS<sub>2</sub> catalysts

*Hai-Yan Su, Federico Calle-Vallejo\*, and Keju Sun\**

\*Corresponding authors. Emails: [federico.calle@ehu.es](mailto:federico.calle@ehu.es); [kjsun@ysu.edu.cn](mailto:kjsun@ysu.edu.cn)

|                                                                                                            |     |
|------------------------------------------------------------------------------------------------------------|-----|
| <b>S1.</b> Assessing <i>cn</i> .....                                                                       | S1  |
| <b>S2.</b> Correlations between d-band centers, S vacancy formation energies and adsorption energies ..... | S2  |
| <b>S3.</b> Correlations between cohesive energies, S vacancy formation energies and <i>cn</i> .....        | S3  |
| <b>S4.</b> Scaling relations between the adsorption energies of N and other atoms .....                    | S4  |
| <b>S5.</b> Differential charge density maps for atomic adsorption .....                                    | S5  |
| <b>S6.</b> Transition-state configurations .....                                                           | S6  |
| <b>S7.</b> Adsorption configurations on Mo edges .....                                                     | S7  |
| <b>S8.</b> Adjacent and far S vacancy configurations .....                                                 | S8  |
| <b>S9.</b> Data, correlations and associated errors .....                                                  | S9  |
| <b>S10.</b> Electrocatalytic modelling .....                                                               | S15 |
| <b>S11.</b> References .....                                                                               | S16 |

## S1. Assessing $cn$

- When the coverage of vacancies is  $\theta = 1/15$  ML (Fig. 1a),  $\text{Mo}_\text{I}$ ,  $\text{Mo}_\text{II}$  and  $\text{Mo}_\text{III}$  coordinate each with 5 S atoms, and each S atom coordinates with 3 Mo atoms. Thus, the number of S atoms coordinated to the  $\text{Mo}_\text{I}$ - $\text{Mo}_\text{III}$  atoms is:  $cn = (5 + 5 + 5) \times 1/3 = 5.00$ .
- When  $\theta = 2/15$  ML (Fig. 1b),  $\text{Mo}_\text{I}$ ,  $\text{Mo}_\text{II}$  and  $\text{Mo}_\text{III}$  coordinate with 5, 4 and 5 S atoms, and each S atom coordinates with 3 Mo atoms. Thus,  $cn = (5 + 4 + 5) \times 1/3 = 4.67$ .
- When  $\theta = 3/15$  ML (Fig. 1c),  $\text{Mo}_\text{I}$ ,  $\text{Mo}_\text{II}$  and  $\text{Mo}_\text{III}$  coordinate with 5, 3 and 5 S atoms, and each S atom coordinates with 3 Mo atoms. Thus,  $cn = (5 + 3 + 5) \times 1/3 = 4.33$ .
- When  $\theta = 4/15$  ML (Fig. 1d),  $\text{Mo}_\text{I}$ ,  $\text{Mo}_\text{II}$  and  $\text{Mo}_\text{III}$  coordinate with 5, 3 and 4 S atoms, and each S atom coordinates with 3 Mo atoms. Thus,  $cn = (5 + 3 + 4) \times 1/3 = 4.00$ .
- When  $\theta = 5/15$  ML (Fig. 1e),  $\text{Mo}_\text{I}$ ,  $\text{Mo}_\text{II}$  and  $\text{Mo}_\text{III}$  coordinate with 5, 3 and 3 S atoms, and each S atom coordinates with 3 Mo atoms. Thus,  $cn = (5 + 3 + 3) \times 1/3 = 3.67$ .
- When  $\theta = 6/15$  ML (Fig. 1f),  $\text{Mo}_\text{I}$ ,  $\text{Mo}_\text{II}$  and  $\text{Mo}_\text{III}$  coordinate with 4, 3 and 3 S atoms, and each S atom coordinates with 3 Mo atoms. Thus,  $cn = (4 + 3 + 3) \times 1/3 = 3.33$ .
- Finally, when  $\theta = 7/15$  ML (Fig. 1g),  $\text{Mo}_\text{I}$ ,  $\text{Mo}_\text{II}$  and  $\text{Mo}_\text{III}$  each coordinate with 3 S atoms, and each S atom coordinates with 3 Mo atoms. Thus,  $cn = (3 + 3 + 3) \times 1/3 = 3.00$ .

## S2. Correlations between d-band centers, S vacancy formation energies and adsorption energies

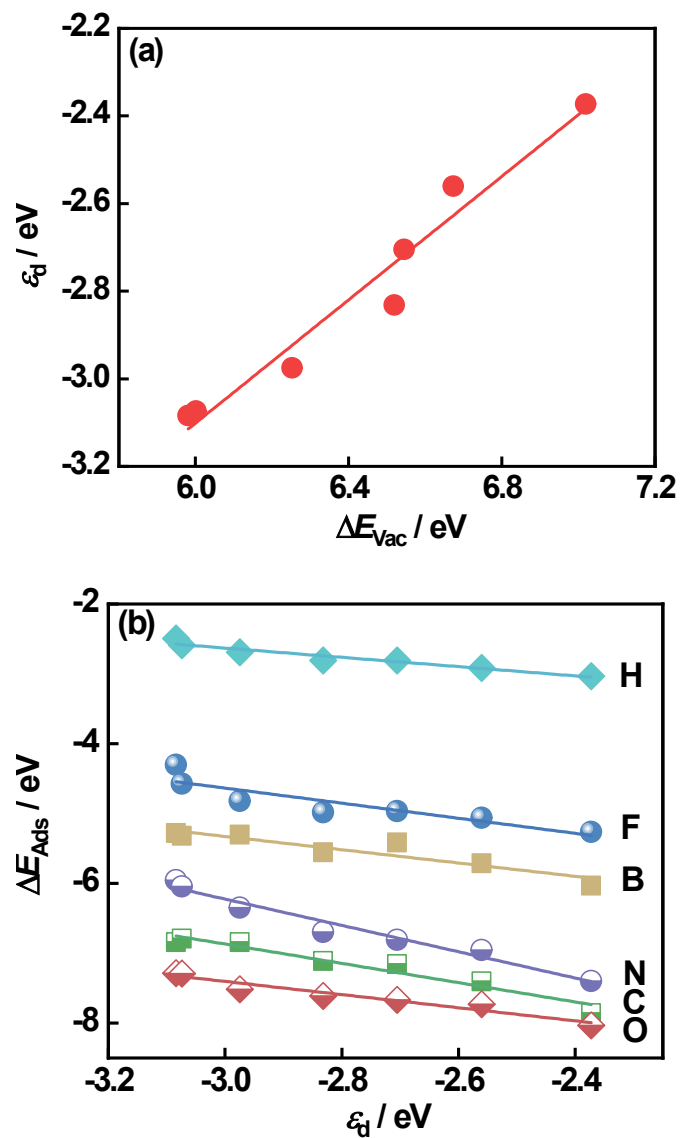

**Figure S1.** Correlation between the d-band center ( $\epsilon_d$ ) of the Mo atoms at the S vacancy in MoS<sub>2</sub>(001) surfaces and (a) S vacancy formation energies ( $\Delta E_{vac}$ ), and (b) the adsorption energies ( $\Delta E_{Ads}$ ) of various atomic species.

### S3. Correlations between cohesive energies, S vacancy formation energies and $cn$

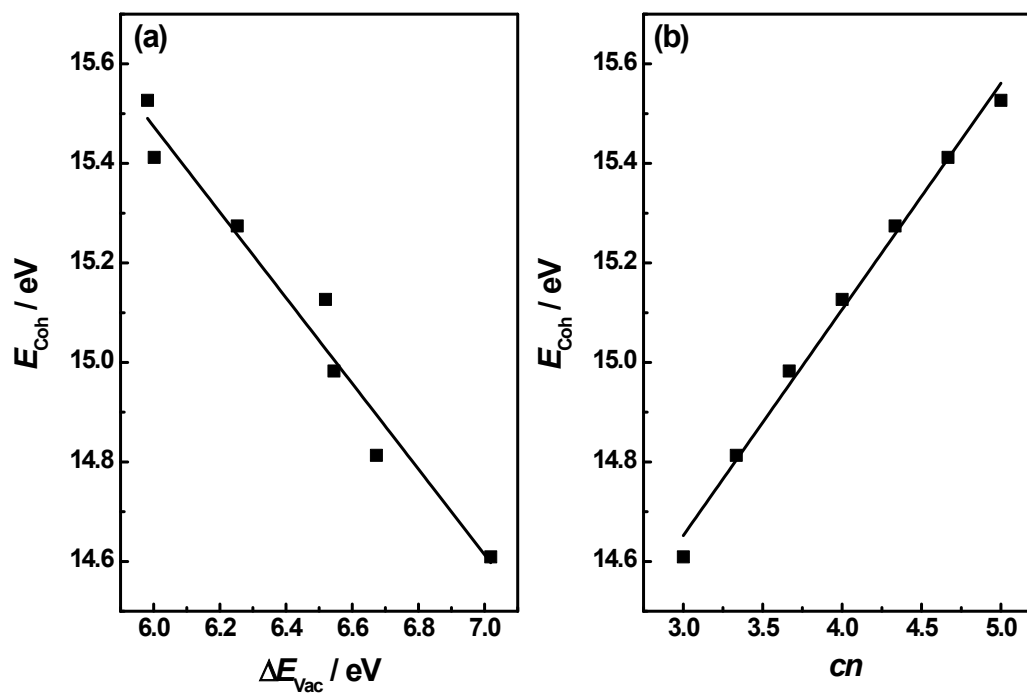

**Figure S2.** Cohesive energies ( $E_{\text{Coh}}$  in eV) as a function of (a) S vacancy formation energies ( $\Delta E_{\text{Vac}}$  in eV) and (b) the number of S atoms coordinated to Mo atoms ( $cn$ ) on S-deficient  $\text{MoS}_2(001)$  surfaces. The data in this figure are tabulated in Tables S1, S2 and S19.

#### S4. Scaling relation between the adsorption energies of N and other atoms

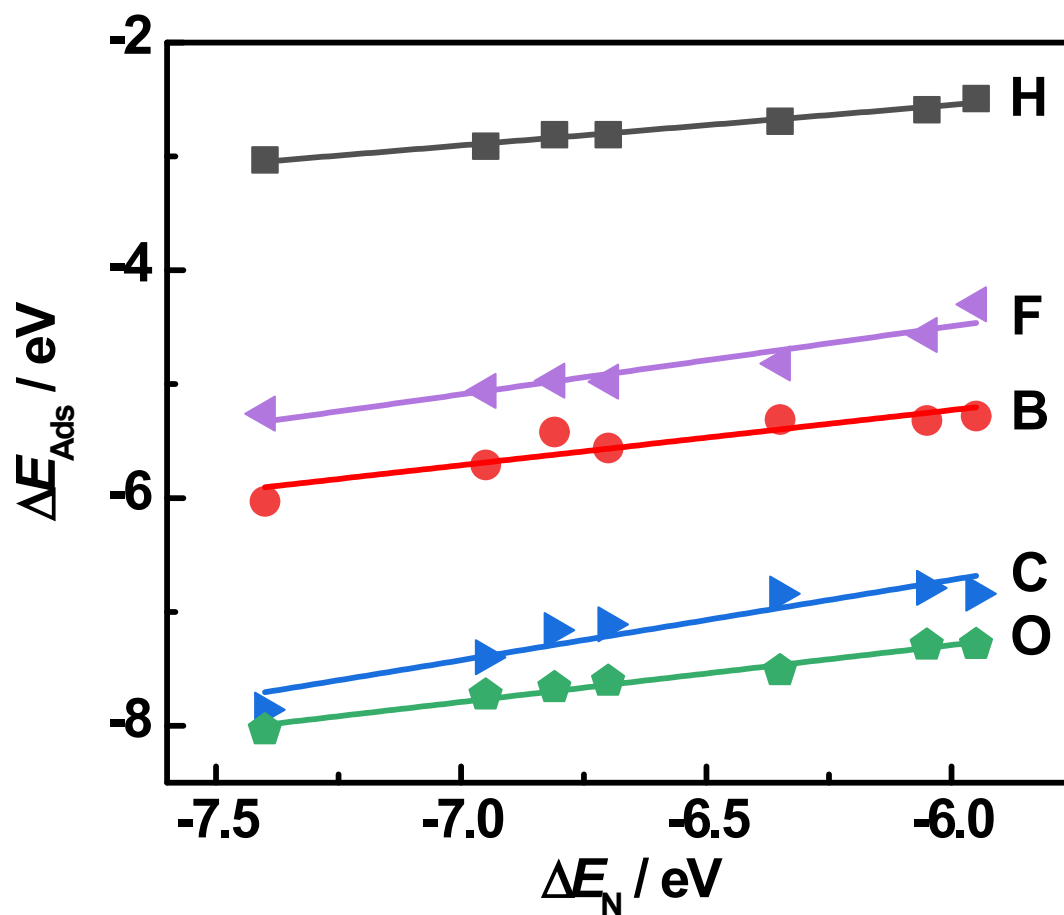

Figure S3. Scaling relation between adsorption energies of \*N ( $\Delta E_N$ ) and other atomic species ( $\Delta E_{\text{Ads}}$ ).

## S5. Differential charge density maps for atomic adsorption

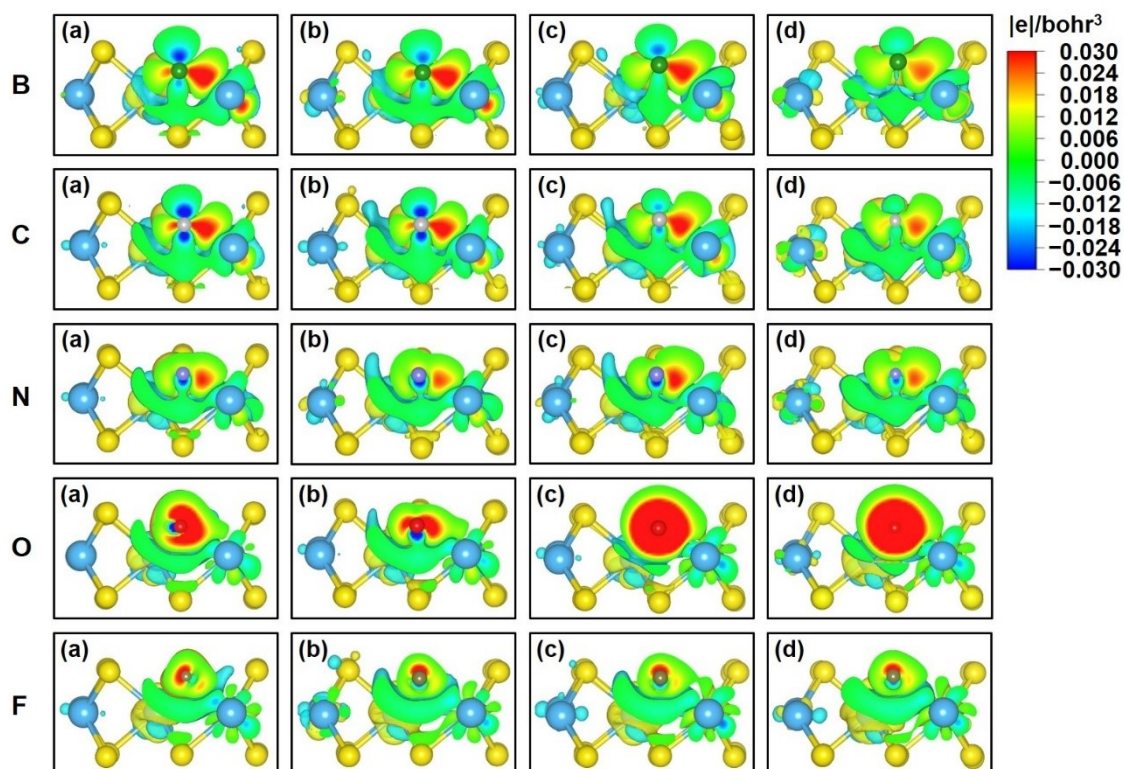

**Figure S4.** Differential charge density maps for B, C, N, O and F adsorption on MoS<sub>2</sub>(001) with S vacancy coverages of (a) 1/15, (b) 1/5, (c) 1/3 and (d) 7/15 ML. Blue, yellow, green, gray, purple, red and dark yellow spheres represent Mo, S, B, C, N, O and F, respectively. Blue and yellow-red isosurfaces indicate charge depletion and accumulation. The 2D profile is a cut along a Mo-adsorbate bond.

## S6. Transition-state configurations

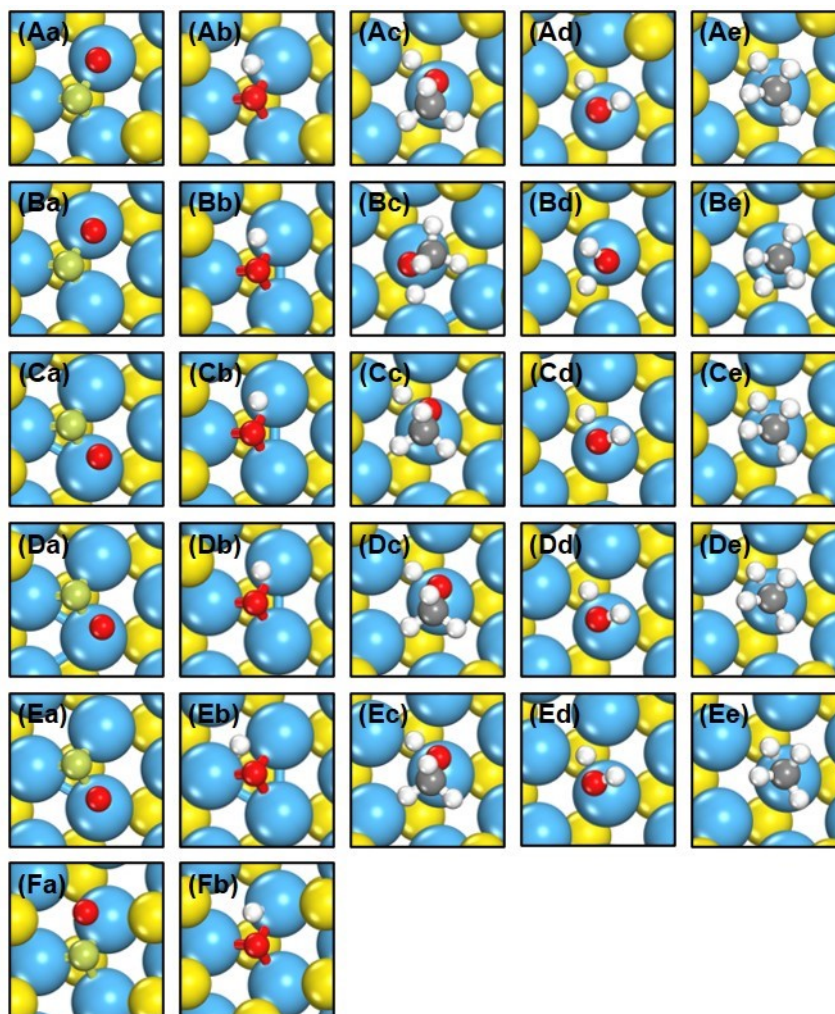

**Figure S5.** Top views of the transition-state structures of (a)  $*NO + * \rightarrow *N + *O$ , (b)  $*O + *H \rightarrow *OH + *$ , (c)  $*CH_3O + *H \rightarrow *CH_3OH + *$ , (d)  $*OH + *H \rightarrow *H_2O + *$  and (e)  $*CH_3 + *H \rightarrow CH_4 + 2*$  on  $MoS_2(001)$  surface with a S vacancy coverage of (A) 1/5, (B) 4/15, (C) 1/3, (D) 2/5, (E) 7/15 and (F) 2/15 ML. Blue, yellow, gray, white, red and green balls represent Mo, S, C, H, O and N atoms, respectively.

## S7. Adsorption configurations on Mo edges

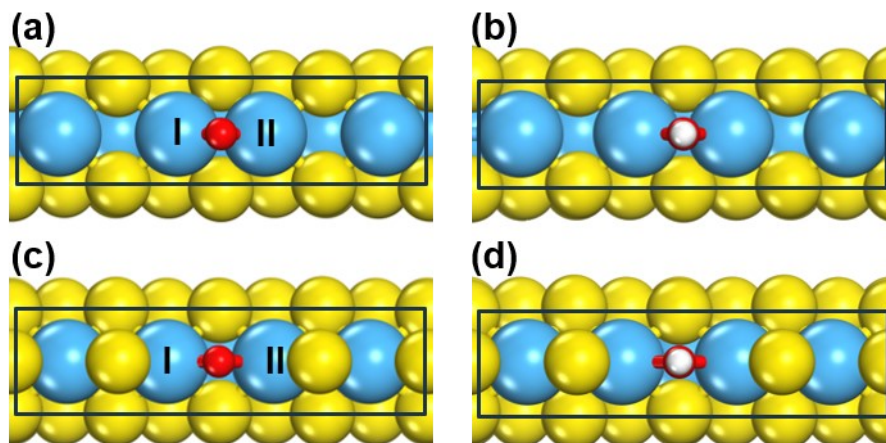

**Figure S6.** Top view of \*O and \*OH adsorption on the Mo edge with 100% S vacancy (a, b) and 62.5% S vacancy (c, d). Blue, yellow, red and white balls represent Mo, S, O and H atoms, respectively. The numbers I and II denote the Mo atoms at the S vacancy under study. In (a),  $\text{Mo}_I$  and  $\text{Mo}_{II}$  coordinate with four S atoms each, and each S atom coordinates with three Mo atoms, hence:  $cn = 4 \times 1/3 \times 2 = 2.67$ . In (c),  $\text{Mo}_I$  and  $\text{Mo}_{II}$  coordinate with five S atoms, four S atoms among those bind to three Mo atoms, and the remaining S atom binds to two Mo atoms. Thus,  $cn = (4 \times 1/3 + 1/2) \times 2 = 3.67$ .



## S8. Adjacent and far S vacancy configurations

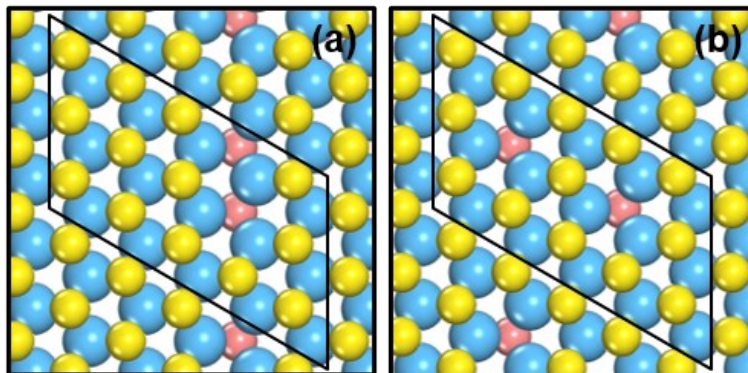

**Figure S7.** Top view of MoS<sub>2</sub>(001) with adjacent (a) and far (b) S vacancy arrangements at 2/15ML vacancy coverages. Blue, yellow and vermillion balls represent Mo, upper S and lower S, respectively.

## S9. Data, correlations and associated errors

In the following, the correlations are given as:  $y = slope \cdot x + intercept$ . For instance, from the first line of Table S2 we have that the correlation of  $cn$  vs  $\Delta E_{Vac}$  is:

$$cn = -1.88 \Delta E_{Vac} + 16.06$$

Cohesive energies are defined as:  $E_{Coh} = (xE_{Mo} + yE_S - E_{Mo_xS_y})/x$ . Our calculated cohesive energy for pristine MoS<sub>2</sub>(001) is 15.58 eV, which is close to the widely accepted value (15.55 eV) in the literature by Ataca and Ciraci, found with PW91.<sup>1</sup>

**Table S1.** Values of the descriptors for the MoS<sub>2</sub>(001) surfaces as a function of the coverage of S vacancies.  $\Delta E_{Vac}$ ,  $\Phi$ ,  $E_{Coh}$  and  $\varepsilon_d$  in eV, excess Bader charge ( $BC$ ) in the adsorbates and integrated  $coop$  in  $e^-$ , integrated  $cohp$  in eV.

| variable         | 1/15ML | 2/15ML | 1/5ML  | 4/15ML | 1/3ML  | 2/5ML  | 7/15ML |
|------------------|--------|--------|--------|--------|--------|--------|--------|
| $\Delta E_{Vac}$ | 5.98   | 6.00   | 6.25   | 6.52   | 6.54   | 6.67   | 7.02   |
| $cn$             | 5.00   | 4.67   | 4.33   | 4.00   | 3.67   | 3.33   | 3.00   |
| $\Phi$           | 5.77   | 5.69   | 5.59   | 5.52   | 5.47   | 5.39   | 5.30   |
| $BC_H$           | -0.33  | -0.34  | -0.35  | -0.37  | -0.37  | -0.39  | -0.41  |
| $BC_B$           | -0.18  | -0.20  | -0.23  | -0.25  | -0.39  | -0.47  | -0.52  |
| $BC_C$           | -0.71  | -0.73  | -0.77  | -0.83  | -0.85  | -0.89  | -0.93  |
| $BC_N$           | -0.92  | -0.94  | -0.96  | -0.98  | -1.00  | -1.02  | -1.04  |
| $BC_O$           | -0.90  | -0.91  | -0.92  | -0.92  | -0.93  | -0.94  | -0.96  |
| $BC_F$           | -0.66  | -0.66  | -0.67  | -0.67  | -0.67  | -0.68  | -0.69  |
| $coop_H$         | 0.24   | 0.24   | 0.23   | 0.24   | 0.22   | 0.23   | 0.23   |
| $coop_B$         | 0.71   | 0.70   | 0.71   | 0.70   | 0.70   | 0.71   | 0.74   |
| $coop_C$         | 0.75   | 0.76   | 0.77   | 0.77   | 0.76   | 0.76   | 0.78   |
| $coop_N$         | 0.62   | 0.63   | 0.63   | 0.64   | 0.63   | 0.63   | 0.64   |
| $coop_O$         | 0.38   | 0.39   | 0.39   | 0.40   | 0.39   | 0.40   | 0.40   |
| $coop_F$         | 0.12   | 0.14   | 0.14   | 0.14   | 0.14   | 0.14   | 0.15   |
| $cohp_H$         | -3.54  | -3.57  | -3.59  | -3.62  | -3.71  | -3.72  | -3.72  |
| $cohp_B$         | -10.07 | -10.10 | -10.09 | -10.06 | -9.90  | -9.57  | -9.85  |
| $cohp_C$         | -12.84 | -12.84 | -12.95 | -13.00 | -12.99 | -13.00 | -13.16 |
| $cohp_N$         | -12.79 | -12.89 | -12.93 | -13.13 | -13.19 | -13.30 | -13.55 |
| $cohp_O$         | -9.86  | -9.96  | -10.11 | -10.18 | -10.28 | -10.39 | -10.58 |
| $cohp_F$         | -4.82  | -5.26  | -5.16  | -5.22  | -5.28  | -5.27  | -5.25  |
| $E_{Coh}$        | 15.53  | 15.41  | 15.27  | 15.13  | 14.98  | 14.81  | 14.61  |
| $\varepsilon_d$  | -3.08  | -3.07  | -2.98  | -2.83  | -2.70  | -2.56  | -2.37  |

**Table S2.** Correlations between  $\Delta E_{\text{vac}}(x)$  and all properties ( $y$ ).  $r$ , MAE and MAX are the correlation coefficient, mean absolute error (in eV) and maximum absolute error (in eV), respectively.

| variables        | intercept | slope | r    | MAE  | MAX  |
|------------------|-----------|-------|------|------|------|
| $cn$             | 16.06     | -1.88 | 0.97 | 0.13 | 0.21 |
| $\Phi$           | 8.29      | -0.43 | 0.98 | 0.03 | 0.04 |
| $BC_H$           | 0.09      | -0.07 | 0.99 | 0.00 | 0.01 |
| $BC_B$           | 1.85      | -0.34 | 0.90 | 0.04 | 0.10 |
| $BC_C$           | 0.59      | -0.22 | 0.99 | 0.01 | 0.02 |
| $BC_N$           | -0.24     | -0.11 | 0.99 | 0.01 | 0.01 |
| $BC_O$           | -0.57     | -0.05 | 0.98 | 0.00 | 0.01 |
| $BC_F$           | -0.48     | -0.03 | 0.97 | 0.00 | 0.01 |
| $coop_H$         | 0.32      | -0.01 | 0.45 | 0.00 | 0.01 |
| $coop_B$         | 0.58      | 0.02  | 0.45 | 0.01 | 0.02 |
| $coop_C$         | 0.65      | 0.02  | 0.70 | 0.01 | 0.01 |
| $coop_N$         | 0.54      | 0.01  | 0.77 | 0.00 | 0.01 |
| $coop_O$         | 0.29      | 0.02  | 0.93 | 0.00 | 0.01 |
| $coop_F$         | 0.02      | 0.02  | 0.57 | 0.00 | 0.01 |
| $cohp_H$         | -2.46     | -0.18 | 0.88 | 0.03 | 0.05 |
| $cohp_B$         | -12.15    | 0.34  | 0.57 | 0.10 | 0.29 |
| $cohp_C$         | -11.11    | -0.29 | 0.97 | 0.02 | 0.03 |
| $cohp_N$         | -8.64     | -0.70 | 0.98 | 0.03 | 0.08 |
| $cohp_O$         | -6.03     | -0.65 | 0.98 | 0.03 | 0.08 |
| $cohp_F$         | -3.61     | -0.24 | 0.43 | 0.09 | 0.25 |
| $E_{\text{Coh}}$ | 20.64     | -0.86 | 0.98 | 0.05 | 0.10 |
| $\epsilon_d$     | -7.33     | 0.70  | 0.97 | 0.04 | 0.10 |

**Table S3.** Adsorption energies (in eV) on MoS<sub>2</sub>(001) as a function of the coverage of S vacancies.

| $\Delta E_{\text{Ads}}$ | 1/15ML | 2/15ML | 1/5ML | 4/15ML | 1/3ML | 2/5ML | 7/15ML |
|-------------------------|--------|--------|-------|--------|-------|-------|--------|
| $\Delta E_H$            | -2.49  | -2.59  | -2.69 | -2.81  | -2.81 | -2.91 | -3.03  |
| $\Delta E_B$            | -5.28  | -5.32  | -5.31 | -5.56  | -5.42 | -5.71 | -6.03  |
| $\Delta E_C$            | -6.84  | -6.79  | -6.84 | -7.11  | -7.16 | -7.40 | -7.86  |
| $\Delta E_N$            | -5.95  | -6.05  | -6.35 | -6.70  | -6.81 | -6.95 | -7.40  |
| $\Delta E_O$            | -7.29  | -7.29  | -7.52 | -7.61  | -7.67 | -7.73 | -8.04  |
| $\Delta E_F$            | -4.30  | -4.57  | -4.82 | -4.98  | -4.97 | -5.06 | -5.26  |
| $\Delta E_{CO}$         | -0.88  | -0.89  | -1.86 | -1.69  | -1.69 | -1.95 | -2.29  |
| $\Delta E_{NO}$         | -2.39  | -2.52  | -3.20 | -3.46  | -3.49 | -3.61 | -3.90  |
| $\Delta E_{SH}$         | -2.70  | -3.10  | -3.49 | -3.83  | -3.90 | -4.04 | -4.31  |
| $\Delta E_{OH}$         | -3.75  | -4.25  | -4.46 | -4.62  | -4.56 | -4.64 | -4.78  |
| $\Delta E_{CH}$         | -6.54  | -6.65  | -6.81 | -6.97  | -7.03 | -7.11 | -7.44  |
| $\Delta E_{CH3}$        | -0.91  | -1.38  | -1.87 | -2.36  | -2.45 | -2.69 | -3.02  |
| $\Delta E_{NH2}$        | -2.85  | -2.94  | -3.19 | -3.43  | -3.38 | -3.51 | -3.74  |
| $\Delta E_{CH2}$        | -4.46  | -4.58  | -4.79 | -4.90  | -4.98 | -5.02 | -5.33  |

|                    |       |       |       |       |       |       |       |
|--------------------|-------|-------|-------|-------|-------|-------|-------|
| $\Delta E_{CNH_2}$ | -4.14 | -4.22 | -4.90 | -5.01 | -5.00 | -5.11 | -5.30 |
| $\Delta E_{CCH_3}$ | -5.37 | -5.51 | -5.95 | -6.11 | -6.13 | -6.22 | -6.50 |

**Table S4.** Correlations between all descriptors ( $x$ ) and hydrogen adsorption energies ( $y$ ).

| descriptor          | intercept | slope | r    | MAE  | MAX  |
|---------------------|-----------|-------|------|------|------|
| $\Delta E_{V_{ac}}$ | 0.37      | -0.49 | 0.98 | 0.02 | 0.05 |
| $cn$                | -3.78     | 0.25  | 0.99 | 0.02 | 0.05 |
| $\Phi$              | -9.02     | 1.13  | 0.99 | 0.01 | 0.03 |
| $BC$                | -0.28     | 6.77  | 0.98 | 0.02 | 0.05 |
| $coop$              | -6.00     | 13.81 | 0.49 | 0.12 | 0.27 |
| $cohp$              | 5.27      | 2.21  | 0.89 | 0.06 | 0.11 |
| $\varepsilon_d$     | -4.62     | -0.66 | 0.96 | 0.04 | 0.08 |

**Table S5.** Correlations between all descriptors ( $x$ ) and boron adsorption energies ( $y$ ).

| descriptor          | intercept | slope  | r    | MAE  | MAX  |
|---------------------|-----------|--------|------|------|------|
| $\Delta E_{V_{ac}}$ | -1.16     | -0.68  | 0.91 | 0.08 | 0.18 |
| $cn$                | -6.87     | 0.34   | 0.86 | 0.10 | 0.21 |
| $\Phi$              | -13.81    | 1.50   | 0.86 | 0.10 | 0.19 |
| $BC$                | -4.96     | 1.74   | 0.84 | 0.10 | 0.22 |
| $coop$              | 4.73      | -14.41 | 0.64 | 0.15 | 0.28 |
| $cohp$              | -14.43    | -0.90  | 0.53 | 0.16 | 0.43 |
| $\varepsilon_d$     | -8.18     | -0.95  | 0.92 | 0.08 | 0.19 |

**Table S6.** Correlations between all descriptors ( $x$ ) and carbon adsorption energies ( $y$ ).

| descriptor          | intercept | slope  | r    | MAE  | MAX  |
|---------------------|-----------|--------|------|------|------|
| $\Delta E_{V_{ac}}$ | -0.90     | -0.97  | 0.94 | 0.10 | 0.14 |
| $cn$                | -9.10     | 0.49   | 0.90 | 0.12 | 0.22 |
| $\Phi$              | -19.04    | 2.15   | 0.90 | 0.12 | 0.22 |
| $BC$                | -3.61     | 4.33   | 0.92 | 0.11 | 0.21 |
| $coop$              | 13.55     | -27.03 | 0.54 | 0.22 | 0.45 |
| $cohp$              | 34.49     | 3.21   | 0.91 | 0.12 | 0.24 |
| $\varepsilon_d$     | -11.01    | -1.38  | 0.97 | 0.07 | 0.12 |

**Table S7.** Correlations between all descriptors ( $x$ ) and nitrogen adsorption energies ( $y$ ).

| descriptor          | intercept | slope  | r    | MAE  | MAX  |
|---------------------|-----------|--------|------|------|------|
| $\Delta E_{V_{ac}}$ | 2.25      | -1.38  | 1.00 | 0.03 | 0.05 |
| $cn$                | -9.43     | 0.71   | 0.98 | 0.07 | 0.12 |
| $\Phi$              | -23.93    | 3.13   | 0.99 | 0.06 | 0.09 |
| $BC$                | 4.97      | 11.81  | 0.99 | 0.05 | 0.06 |
| $coop$              | 32.40     | -61.73 | 0.74 | 0.27 | 0.49 |
| $cohp$              | 18.76     | 1.93   | 0.99 | 0.06 | 0.12 |
| $\varepsilon_d$     | -11.88    | -1.88  | 0.98 | 0.07 | 0.15 |

**Table S8.** Correlations between all descriptors ( $x$ ) and oxygen adsorption energies ( $y$ ).

| descriptor              | intercept | slope  | r    | MAE  | MAX  |
|-------------------------|-----------|--------|------|------|------|
| $\Delta E_{\text{Vac}}$ | -3.15     | -0.69  | 0.99 | 0.02 | 0.05 |
| $cn$                    | -8.99     | 0.35   | 0.96 | 0.06 | 0.09 |
| $\Phi$                  | -16.22    | 1.56   | 0.97 | 0.05 | 0.08 |
| $BC$                    | 3.73      | 12.21  | 0.98 | 0.04 | 0.07 |
| $coop$                  | 7.01      | -37.19 | 0.92 | 0.07 | 0.13 |
| $coh_p$                 | 3.02      | 1.04   | 0.98 | 0.04 | 0.07 |
| $\varepsilon_d$         | -10.23    | -0.94  | 0.97 | 0.05 | 0.09 |

**Table S9.** Correlations between all descriptors ( $x$ ) and fluorine adsorption energies ( $y$ ).

| descriptor              | intercept | slope  | r    | MAE  | MAX  |
|-------------------------|-----------|--------|------|------|------|
| $\Delta E_{\text{Vac}}$ | 0.41      | -0.82  | 0.94 | 0.07 | 0.19 |
| $cn$                    | -6.57     | 0.43   | 0.95 | 0.07 | 0.13 |
| $\Phi$                  | -15.48    | 1.92   | 0.97 | 0.06 | 0.11 |
| $BC$                    | 12.96     | 26.58  | 0.93 | 0.08 | 0.18 |
| $coop$                  | -1.29     | -25.53 | 0.82 | 0.12 | 0.29 |
| $coh_p$                 | 2.93      | 1.50   | 0.70 | 0.13 | 0.40 |
| $\varepsilon_d$         | -7.87     | -1.08  | 0.88 | 0.10 | 0.24 |

**Table S10.** Averages (in eV) per descriptor of the mean absolute errors in Tables S4-S9.

| descriptor              | overall MAE |
|-------------------------|-------------|
| $\Delta E_{\text{Vac}}$ | 0.06        |
| $cn$                    | 0.07        |
| $\Phi$                  | 0.07        |
| $BC$                    | 0.07        |
| $coop$                  | 0.16        |
| $coh_p$                 | 0.10        |
| $\varepsilon_d$         | 0.07        |

**Table S11.** Correlations between  $\Delta E_{\text{Vac}}$  ( $x$ ) and adsorption energies of diatomic species ( $y$ ).

| species                | intercept | slope | r    | MAE  | MAX  |
|------------------------|-----------|-------|------|------|------|
| $\Delta E_{\text{CO}}$ | 6.69      | -1.29 | 0.89 | 0.14 | 0.48 |
| $\Delta E_{\text{NO}}$ | 6.11      | -1.45 | 0.95 | 0.13 | 0.23 |
| $\Delta E_{\text{SH}}$ | 5.67      | -1.45 | 0.95 | 0.13 | 0.28 |
| $\Delta E_{\text{OH}}$ | 0.65      | -0.79 | 0.82 | 0.13 | 0.34 |
| $\Delta E_{\text{CH}}$ | -1.83     | -0.80 | 0.99 | 0.03 | 0.06 |
| Average                |           |       |      | 0.11 |      |

**Table S12.** Correlations between  $cn(x)$  and adsorption energies of diatomic species ( $y$ ).

| species         | intercept | slope | r    | MAE  | MAX  |
|-----------------|-----------|-------|------|------|------|
| $\Delta E_{CO}$ | -4.25     | 0.66  | 0.87 | 0.16 | 0.48 |
| $\Delta E_{NO}$ | -6.22     | 0.75  | 0.94 | 0.14 | 0.24 |
| $\Delta E_{SH}$ | -6.68     | 0.76  | 0.97 | 0.10 | 0.21 |
| $\Delta E_{OH}$ | -6.15     | 0.43  | 0.86 | 0.13 | 0.27 |
| $\Delta E_{CH}$ | -8.57     | 0.41  | 0.98 | 0.04 | 0.10 |
| Average         |           |       |      | 0.11 |      |

**Table S13.** Correlations between  $\Delta E_{Vac}(x)$  and adsorption energies of multiatomic species ( $y$ ).

| species           | intercept | slope | r    | MAE  | MAX  |
|-------------------|-----------|-------|------|------|------|
| $\Delta E_{CH3}$  | 10.31     | -1.93 | 0.96 | 0.15 | 0.32 |
| $\Delta E_{NH2}$  | 2.06      | -0.83 | 0.99 | 0.03 | 0.07 |
| $\Delta E_{CH2}$  | 0.08      | -0.77 | 0.99 | 0.04 | 0.07 |
| $\Delta E_{CNH2}$ | 2.33      | -1.11 | 0.91 | 0.13 | 0.28 |
| $\Delta E_{CCH3}$ | 0.69      | -1.04 | 0.97 | 0.07 | 0.16 |
| Average           |           |       |      | 0.09 |      |

**Table S14.** Correlations between  $cn(x)$  and adsorption energies of multiatomic species ( $y$ ).

| species           | intercept | slope | r    | MAE  | MAX  |
|-------------------|-----------|-------|------|------|------|
| $\Delta E_{CH3}$  | -6.17     | 1.02  | 0.98 | 0.11 | 0.26 |
| $\Delta E_{NH2}$  | -5.00     | 0.43  | 0.97 | 0.06 | 0.13 |
| $\Delta E_{CH2}$  | -6.45     | 0.40  | 0.97 | 0.05 | 0.11 |
| $\Delta E_{CNH2}$ | -7.10     | 0.57  | 0.90 | 0.14 | 0.28 |
| $\Delta E_{CCH3}$ | -8.11     | 0.53  | 0.96 | 0.08 | 0.15 |
| Average           |           |       |      | 0.09 |      |

**Table S15.** Reaction energies ( $\Delta H$ , in eV) and activation energies ( $\Delta E_{Act}$ , in eV) of various elementary reactions on the MoS<sub>2</sub>(001) surfaces as a function of the coverage of S vacancies.

| reaction                              |                  | 2/15ML | 1/5ML | 4/15ML | 1/3ML | 2/5ML | 7/15ML |
|---------------------------------------|------------------|--------|-------|--------|-------|-------|--------|
| $*O + *H \rightarrow *OH + *$         | $\Delta H$       | 0.74   | 0.86  | 0.91   | 1.02  | 1.12  | 1.40   |
|                                       | $\Delta E_{Act}$ | 1.78   | 1.96  | 2.02   | 2.03  | 2.08  | 2.10   |
| $*CH_3O + *H \rightarrow *CH_3OH + *$ | $\Delta H$       |        | 0.78  | 1.03   | 1.00  | 1.19  | 1.55   |
|                                       | $\Delta E_{Act}$ |        | 1.73  | 1.99   | 1.82  | 2.01  | 2.24   |
| $*OH + *H \rightarrow *H_2O + *$      | $\Delta H$       |        | 0.68  | 1.00   | 0.89  | 1.11  | 1.39   |
|                                       | $\Delta E_{Act}$ |        | 1.69  | 1.91   | 1.86  | 1.97  | 2.13   |
| $*CH_3 + *H \rightarrow CH_4 + 2*$    | $\Delta H$       |        | -0.15 | 0.45   | 0.54  | 0.88  | 1.33   |
|                                       | $\Delta E_{Act}$ |        | 0.59  | 1.03   | 1.15  | 1.38  | 1.79   |
| $*NO + * \rightarrow *N + *O$         | $\Delta H$       | -3.24  | -3.08 | -3.26  | -3.41 | -3.50 | -3.95  |
|                                       | $\Delta E_{Act}$ | 1.01   | 0.77  | 0.68   | 0.59  | 0.55  | 0.45   |

**Table S16.** Correlations between  $cn$  ( $x$ ) and reaction energies ( $\Delta H$ ) and activation energies ( $\Delta E_{\text{Act}}$ ) ( $y$ ) for various elementary reactions.

| reaction                                                                 |                         | intercept | slope | r    | MAE  | MAX  |
|--------------------------------------------------------------------------|-------------------------|-----------|-------|------|------|------|
| $*\text{O} + *\text{H} \rightarrow *\text{OH} + *$                       | $\Delta H$              | 2.37      | -0.36 | 0.95 | 0.05 | 0.09 |
|                                                                          | $\Delta E_{\text{Act}}$ | 2.65      | -0.17 | 0.87 | 0.04 | 0.08 |
| $*\text{CH}_3\text{O} + *\text{H} \rightarrow *\text{CH}_3\text{OH} + *$ | $\Delta H$              | 2.98      | -0.51 | 0.92 | 0.08 | 0.11 |
|                                                                          | $\Delta E_{\text{Act}}$ | 3.10      | -0.31 | 0.78 | 0.08 | 0.14 |
| $*\text{OH} + *\text{H} \rightarrow *\text{H}_2\text{O} + *$             | $\Delta H$              | 2.70      | -0.46 | 0.89 | 0.08 | 0.14 |
|                                                                          | $\Delta E_{\text{Act}}$ | 2.95      | -0.28 | 0.90 | 0.05 | 0.09 |
| $*\text{CH}_3 + *\text{H} \rightarrow \text{CH}_4 + 2*$                  | $\Delta H$              | 4.34      | -1.02 | 0.97 | 0.09 | 0.18 |
|                                                                          | $\Delta E_{\text{Act}}$ | 4.21      | -0.83 | 0.98 | 0.07 | 0.12 |
| $*\text{NO} + * \rightarrow *\text{N} + *\text{O}$                       | $\Delta H$              | -5.03     | 0.42  | 0.84 | 0.13 | 0.19 |
|                                                                          | $\Delta E_{\text{Act}}$ | -0.50     | 0.31  | 0.95 | 0.05 | 0.08 |

**Table S17.** Number of S atoms coordinated to Mo atoms ( $cn$ ) and adsorption energies ( $\Delta E_{\text{Ads}}$ , in eV) of  $*\text{O}$  and  $*\text{OH}$  at the S vacancy ( $S_v$ ) on the Mo edge with different S vacancy ( $S_v$ ) arrangement.

| description         | $cn$ | $\Delta E_{\text{Ads}}(\text{O})$ | $\Delta E_{\text{Ads}}(\text{OH})$ |
|---------------------|------|-----------------------------------|------------------------------------|
| Mo edge-100% $S_v$  | 2.67 | -7.95                             | -5.12                              |
| Mo edge-62.5% $S_v$ | 3.67 | -5.56                             | -4.27                              |

**Table S18.** Adsorption energies ( $\Delta E_{\text{Ads}}$ , in eV) of species at favorable adsorption sites on a S edge with 50% S vacancy ( $S_v$ ) coverage and a Mo edge with 62.5%  $S_v$  coverage.  $\Delta E_{\text{Ads}}$  of H is calculated with respect to  $1/2\text{H}_2$  in gas phase. Data taken from Appl. Surf. Sci. 2023, 635, 157721.

| species                | S edge ( $cn = 3.33$ ) | Mo edge ( $cn = 3.67$ ) |
|------------------------|------------------------|-------------------------|
| H                      | -0.19                  | -0.31                   |
| CO                     | -0.67                  | -1.08                   |
| O                      | -5.41                  | -5.56                   |
| OH                     | -3.41                  | -4.27                   |
| CHO                    | -1.84                  | -2.16                   |
| $\text{CH}_2\text{O}$  | -0.28                  | -0.94                   |
| $\text{CH}_3\text{O}$  | -2.68                  | -3.34                   |
| $\text{CH}_2\text{OH}$ | -1.31                  | -2.12                   |
| HCOO                   | -2.74                  | -3.15                   |
| COOH                   | -2.02                  | -2.54                   |
| $\text{CH}_3$          | -1.43                  | -1.77                   |

**Table S19.** Correlation between the number of S atoms coordinated to Mo atoms  $cn$  ( $x$ ) and cohesive energies  $E_{\text{Coh}}$  ( $y$ ) in eV.

| intercept | slope | r    | MAE  | MAX  |
|-----------|-------|------|------|------|
| 13.29     | 0.45  | 1.00 | 0.02 | 0.04 |

## S10. Electrocatalytic modelling

We employed the microkinetic model by Nørskov et al to estimate the HER exchange current densities ( $i_0$ ).<sup>2</sup> In this model, the left leg of the activity plot, for catalysts with  $\Delta G_H < 0$ , is given by:

$$i_0 = \frac{-ec \cdot k_0}{1 + e^{-\Delta G_H/k_B T}} \quad (\text{S1})$$

In Equation S1  $-ec = 1.602 \cdot 10^{-19} \text{C}$  is the charge of an electron, T is the absolute temperature and was set to 300 K,  $k_B = 8.617 \cdot 10^{-5} \text{eV K}^{-1}$  is the Boltzmann constant, and  $k_0$  is a free parameter in the model used to provide exchange current densities of similar magnitude as the experimental ones but has no influence on the activity trends. In this case, we used a value of  $2 \cdot 10^{15} \text{s}^{-1} \text{cm}^{-2}$ , which gives exchange current densities around the apex of the activity plot close to  $40 \mu\text{A cm}^{-2}$ , in line with those in previous works.<sup>3</sup> Furthermore, the right leg of the activity plot, where catalysts display  $\Delta G_H > 0$ , the exchange current density is given by:

$$i_0 = \frac{-ec \cdot k_0 \cdot e^{-\Delta G_H/k_B T}}{1 + e^{-\Delta G_H/k_B T}} \quad (\text{S2})$$

The free energy of adsorption of hydrogen was calculated as  $\Delta G_H = \Delta E_H^{DFT} + \Delta ZPE - T\Delta S + xcc$ . In this equation,  $\Delta E_H^{DFT} = E_{*H} - E_* - \frac{1}{2}E_{H_2}$  is the binding energy of hydrogen, calculated by changing the scale of the values in Table S3;  $\Delta ZPE$  is the zero-point energy change ( $ZPE_{*H} = 0.15 \text{ eV}$ ,  $ZPE_{H_2} = 0.27 \text{ eV}$ );  $T\Delta S$  is the entropic contribution to the free energy ( $TS_{*H} = 0.01 \text{ eV}$ ,  $TS_{H_2} = 0.40 \text{ eV}$ ); and  $xcc$  is an exchange-correlation correction necessary here because the calculations of Nørskov et al were made with RPBE and ours with PBE, and PBE usually provides stronger adsorption energies



than RPBE  $x_{cc} = 0.17$  eV. This value is calculated as the difference between the adsorption energy of \*H on Pt(111) using PBE (-0.26 eV) and RPBE (-0.09 eV).<sup>2</sup> As experiments have shown that Pt(111) binds \*H too strongly by  $\sim 0.1$  eV,<sup>4</sup> the RPBE-calculated adsorption energy is presumably more accurate in this case.

For completeness, we ought to mention that there are some criticisms to Nørskov et al.'s microkinetic model in the literature.<sup>5-8</sup> Interested readers are kindly advised to read the cited references.

## S11. References

1. Ataca, C.; Ciraci, S. Functionalization of Single-Layer MoS<sub>2</sub> Honeycomb Structures. *J. Phys. Chem. C* **2011**, *115*, 13303–13311.
2. Nørskov, J. K.; Bligaard, T.; Logadottir, A.; Kitchin, J. R.; Chen, J. G.; Pandelov, S.; Stimming, U. Trends in the Exchange Current for Hydrogen Evolution. *J. Electrochem. Soc.* **2005**, *152*, J23.
3. Li, H.; Tsai, C.; Koh, A. L.; Cai, L.; Contryman, A. W.; Fragapane, A. H.; Zhao, J.; Han, H. S.; Manoharan, H. C.; Abild-Pedersen, F.; Nørskov, J. K.; Zheng, X. Activating and Optimizing MoS<sub>2</sub> Basal Planes for Hydrogen Evolution through the Formation of Strained Sulphur Vacancies. *Nat. Mater.* **2016**, *15*, 48–53.
4. Pohl, M. D.; Watzele, S.; Calle-Vallejo, F.; Bandarenka, A. S. Nature of Highly Active Electrocatalytic Sites for the Hydrogen Evolution Reaction at Pt Electrodes in Acidic Media. *ACS Omega* **2017**, *2*, 8141–8147.
5. Quaino, P.; Juarez, F.; Santos, E.; Schmickler, W. Volcano Plots in Hydrogen Electrocatalysis—Uses and Abuses. *Beilstein J. Nanotech.* **2014**, *5*, 846–854.

6. Zeradjanin, A. R.; Grote, J. -P.; Polymeros, G.; Mayhofer, K. J. J. A Critical Review on Hydrogen Evolution Electrocatalysis: Re-Exploring the Volcano-Relationship. *Electroanal.* **2016**, *28*, 2256–2269.
7. Lindgren, P.; Kastlunger, G.; Peterson, A. A. A Challenge to the G similar to 0 Interpretation of Hydrogen Evolution. *ACS Catal.* **2020**, *10*, 121–128.
8. Exner, K. S. Does a Thermoneutral Electrocatalyst Correspond to the Apex of a Volcano Plot for a Simple Two-Electron Process? *Angew. Chem. Int. Ed.* **2020**, *132*, 10320–10324.
